# Supplementary material for: Improving nitrogen cycling in a land surface model (CLM5) to quantify soil N 2 O, NO and NH 3 emissions from enhanced rock weathering with croplands
Source: Copernicus journal article supplement (doi:10.5194/gmd-2023-47), 2023-03-13
Supplement: Supplementary file 1 [file gmd-2023-47-supplement.pdf]

# Improving nitrogen cycling in a land surface model (CLM5) to quantify soil N<sub>2</sub>O, NO and NH<sub>3</sub> emissions from enhanced rock weathering with croplands

Maria Val Martin et al.,

## Supplementary Figures

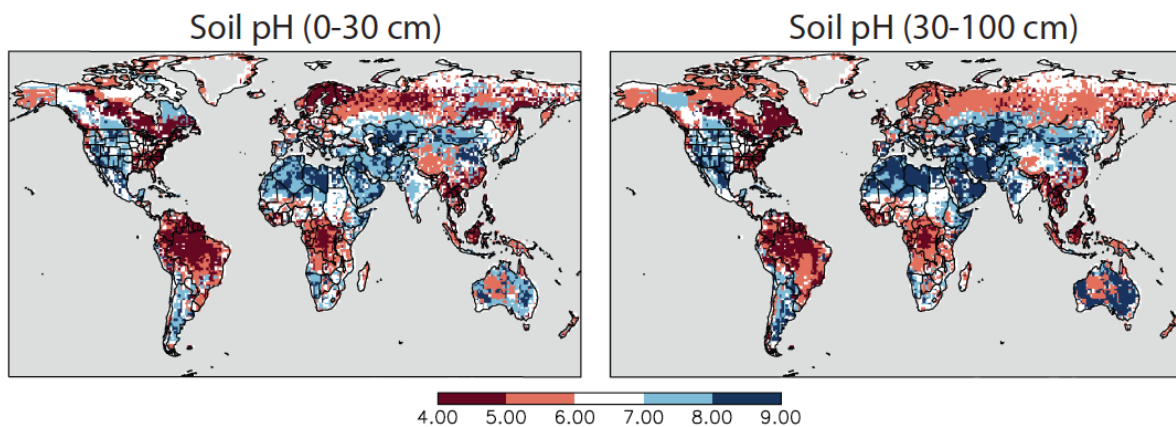

**Figure S1:** Global map of topsoil (0-30 m) and subsoil (30-100 cm) pH from Harmonized World Soil Database v1.2, regridded to the Community Land Model (CLM) grid cell resolution (0.9 degree x 1.25 degree) for the nominal year of 2000.

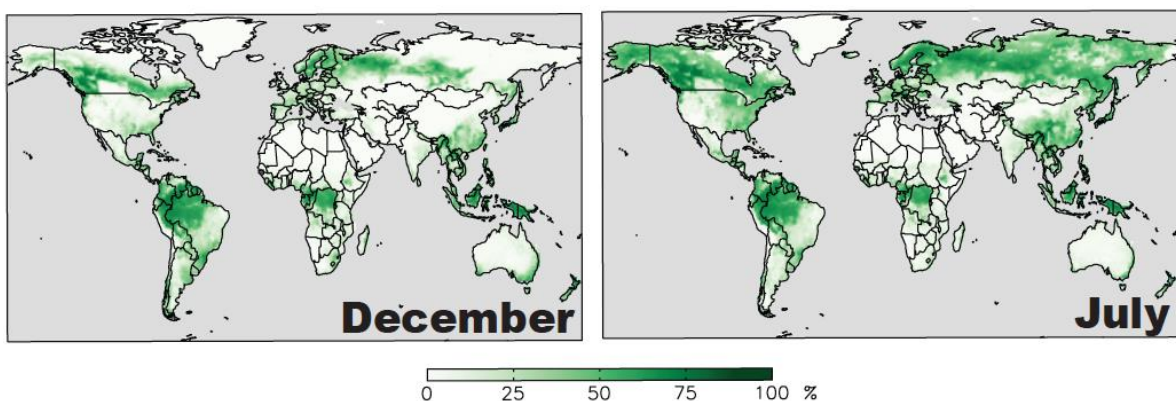

**Figure S2:** Monthly average of the canopy reduction factor for December and July implemented in CLM5, calculated using Yan et al., (2005) approach.

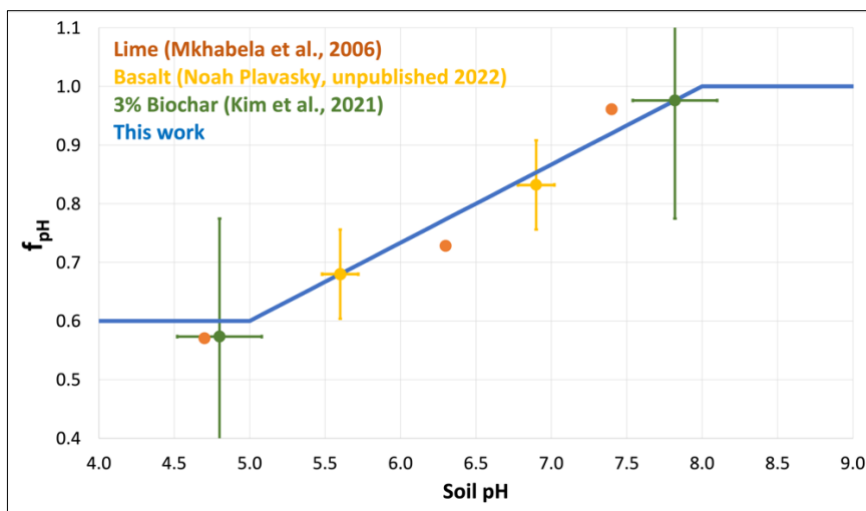

**Figure S3:** New model parameterization of the  $\text{NH}_3$  emission in CLM5 as a function of soil pH ( $f_{\text{pH}}$ ) derived from direct observations from basalt (12 t rock/ha), biochar (3%) and lime applications (See section 2.3.4 for further information).

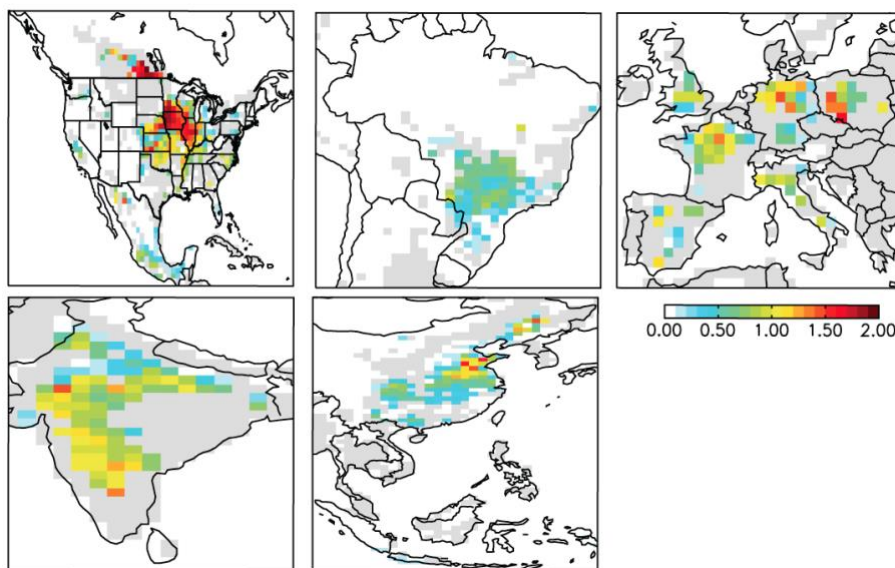

**Figure S4:** Close-up view for the changes in soil pH after annual basalt applications in a 25-year timeframe to remove 2 Gt  $\text{CO}_2$  (Beerling et al., 2020). Grey are grid cells with > 10% crops, in which basalt was not applied.

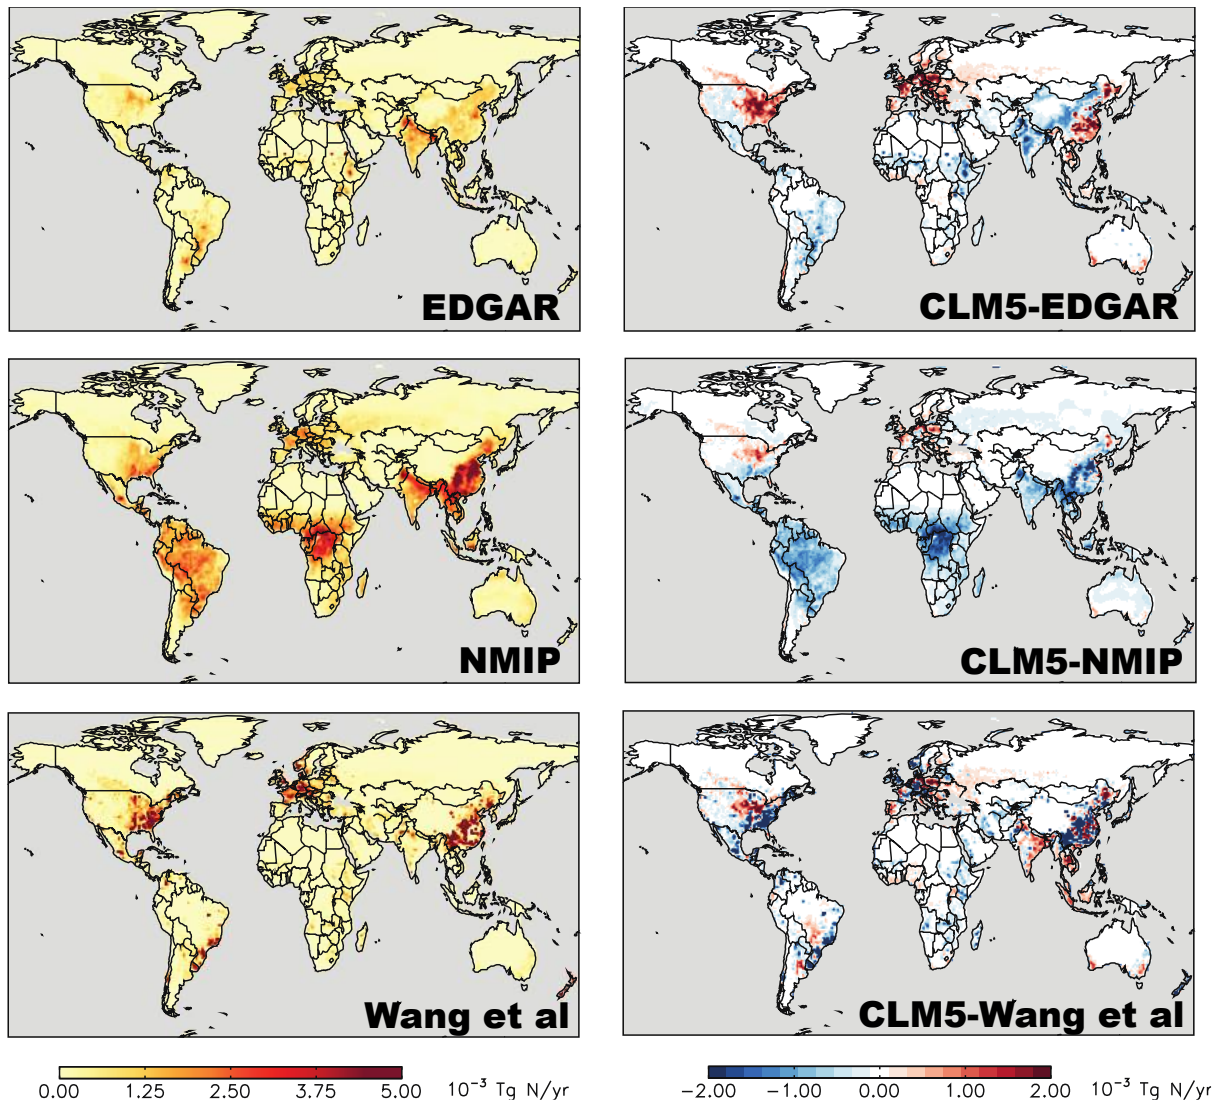

**Figure S5:** Comparison of soil N<sub>2</sub>O emission estimated by CLM5 and other emission inventories. Spatial distribution of annual-total N<sub>2</sub>O emission estimated by EDGAR, NMIP and Wang et al. (2020) (left column) and differences in annual total N<sub>2</sub>O between CLM5 and previously recorded estimates (right column) are shown, correspondingly. Colour scales are saturated at respective values.

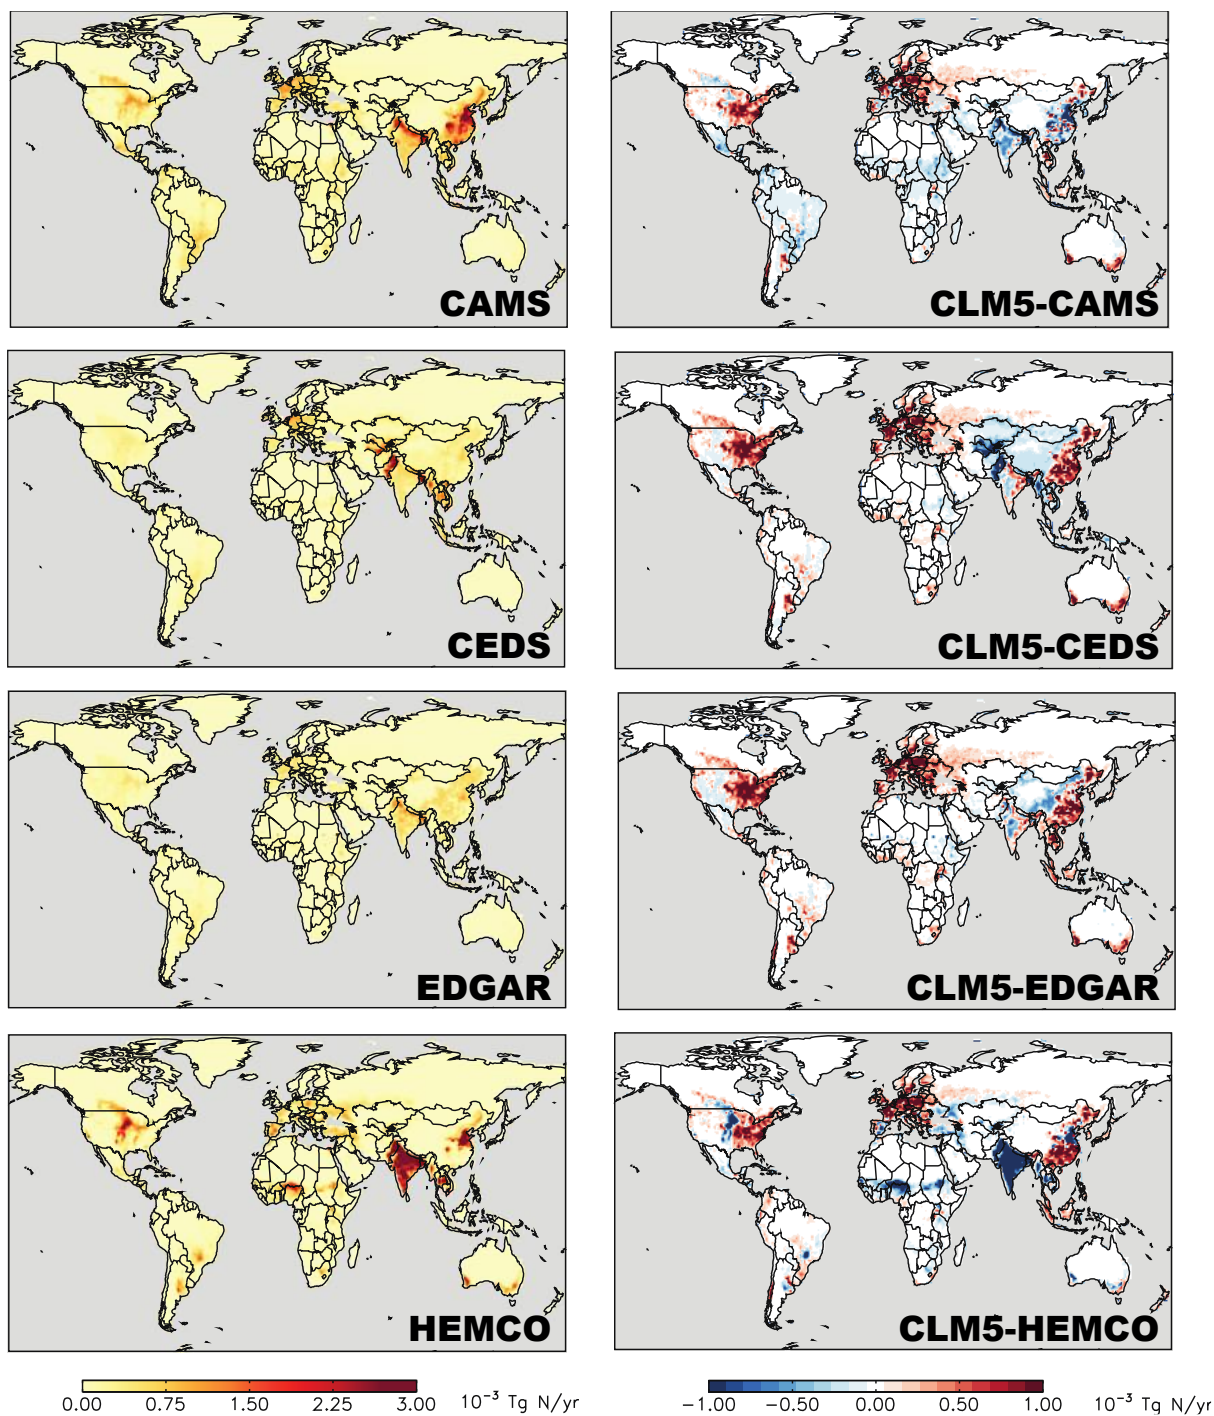

**Figure S6:** Comparison of soil NO emission estimated by CLM5 and emission inventories (Table 1). Spatial distribution of annual-total N<sub>2</sub>O emission estimated by CAMS, CEDS, EDGAR and HEMCO (left column) and differences in annual total NO between CLM5 and the emission inventories (right column) are shown, correspondingly. Soil NO emissions in HEMCO were weighted by cropland fraction. Colour scales are saturated at respective values.

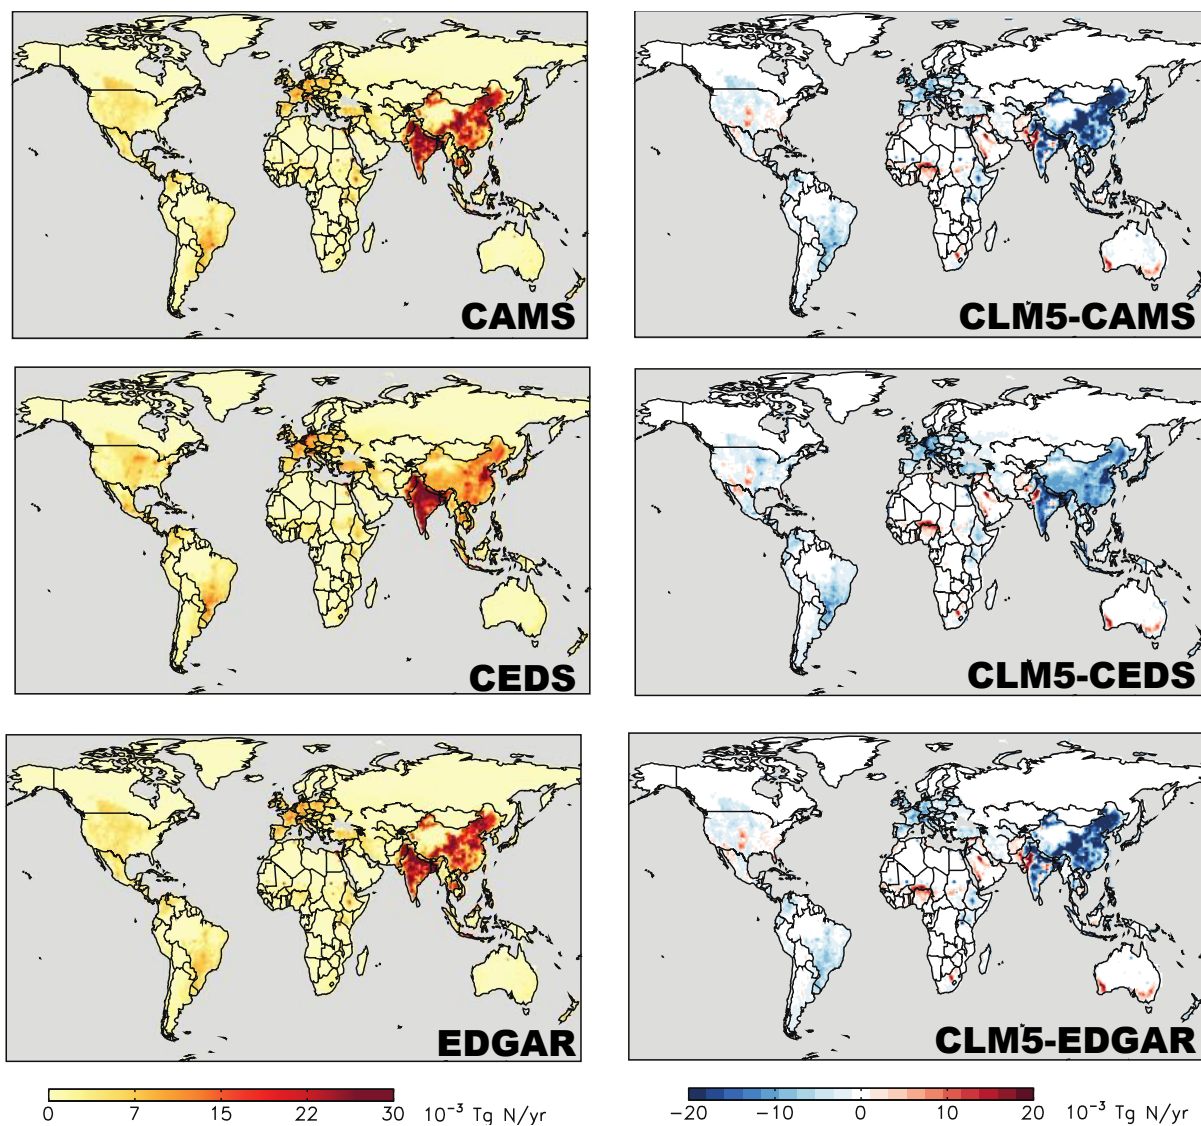

**Figure S7:** Comparison of soil  $\text{NH}_3$  emission estimated by CLM5 and other emission inventories (Table 1). Spatial distribution of annual-total  $\text{NH}_3$  emission estimated by CAMS, CEDS and EDGAR (left column) and differences in annual total  $\text{NH}_3$  between CLM5 and the emission inventories (right column) are shown, correspondingly. Colour scales are saturated at respective values.

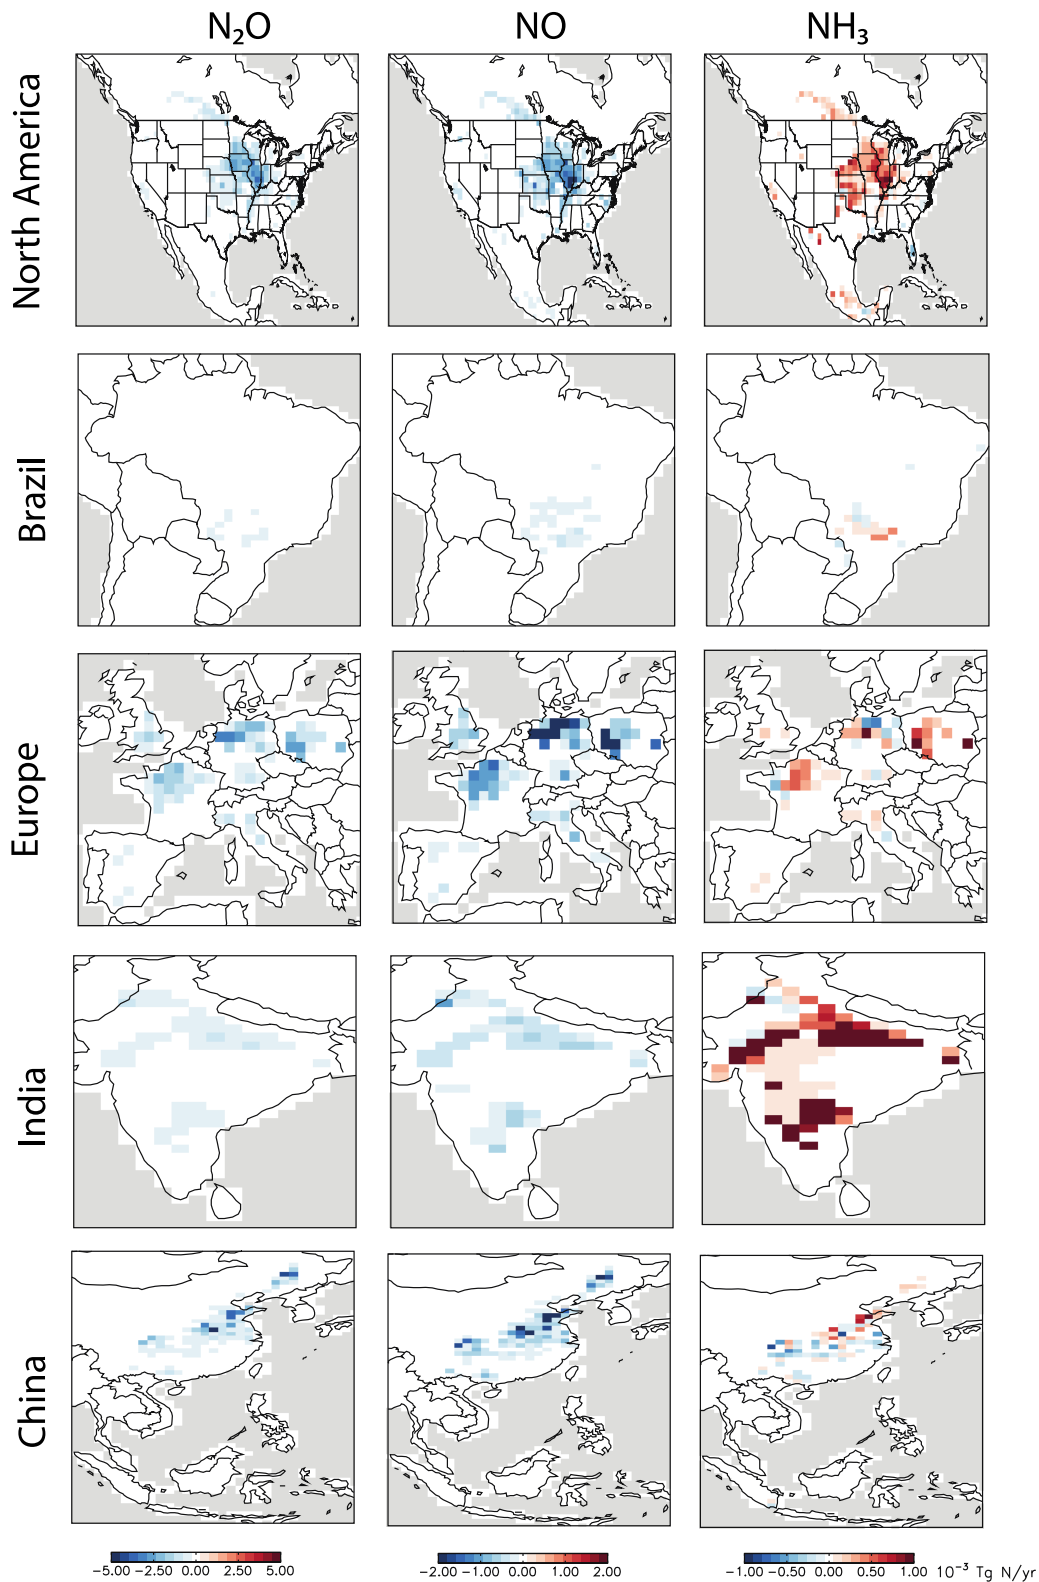

**Figure S8:** Close-up view of the changes in annual soil  $N_2O$ ,  $NO$  and  $NH_3$  fluxes across the main five agriculture regions (North America, Brazil, Europe, India, and China) based on reductions in soil pH projected by the ERW model to sequester 2 Gt  $CO_2$ /yr (Beerling et al., 2020).

## References:

Beerling, D.J., Kantzas, E.P., Lomas, M.R. et al. (2020), Potential for large-scale CO<sub>2</sub> removal via enhanced rock weathering with croplands. *Nature* **583**, 242–248. <https://doi.org/10.1038/s41586-020-2448-9>

Wang, Q., Feng Zhou, Ziyin Shang, Philippe Ciais, Wilfried Winiwarter, Robert B Jackson, Francesco N Tubiello, Greet Janssens-Maenhout, Hanqin Tian, Xiaoqing Cui, Josep G Canadell, Shilong Piao, Shu Tao (2020), Data-driven estimates of global nitrous oxide emissions from croplands, *National Science Review*, Volume 7, Issue 2, 441–452, <https://doi.org/10.1093/nsr/nwz087>

Wieder, W.R., J. Boehnert, G.B. Bonan, and M. Langseth. 2014. RegridDED Harmonized World Soil Database v1.2. Data set. Available on-line [<http://daac.ornl.gov>] from Oak Ridge National Laboratory Distributed Active Archive Center, Oak Ridge, Tennessee, USA. <http://dx.doi.org/10.3334/ORNLDAAC/1247>.
